# Supplementary material
Source: Springer Nature journal article supplement (https://www.springermedizin.de/resource/supplementary/12955_2009_633_MOESM2_ESM.pdf/9560850)
Supplement: MOESM2 [file 9560850]

## PHASE 1: Face Validity

- a) Qualitative interviews mapping expressed needs to tool items

*Patients n=90*

*Families n=38*

- b) Cognitive interviews to investigate comprehension

*Patients n=73*

*Families n=29*

## PHASE 2: Construct Validity

Cross sectional POS & MVQoL correlation

*Patients n=285*

*Families n=199*

## PHASE 3:

- a) Internal consistency
- b) Test-retest reliability
- c) Time to complete

*Patients n=307*

*Families n=200*
